# Supplementary material for: Fabrication of oxygen-vacancy abundant NiAl-layered double hydroxides for ultrahigh capacity supercapacitors
Source: Royal Society of Chemistry journal article supplement (doi:10.1039/d4dt02351j), 2024-11-18
Supplement: d4dt02351j1.pdf [file d4dt02351j1.pdf]

**Electronic Supplementary Information**

**Fabrication of Oxygen-Vacancy Abundant NiAl-Layered  
Double Hydroxides for Ultrahigh Capacity Supercapacitors**

*Ziyu Wang<sup>1</sup>, Yifan Song<sup>2</sup>, Ruiqi Li<sup>1</sup>, Risheng Li<sup>2</sup>, Runping Jia<sup>2</sup>, Kunliang Nie<sup>3\*</sup>,*

*Haijiao Xie<sup>4</sup>, Xiaowei Xu<sup>2\*</sup>, Lin Lin<sup>1\*</sup>*

<sup>1</sup>School of Chemical and Environmental Engineering, Shanghai Institute of Technology, Shanghai, 201418, PR China, linlin@sit.edu.cn;

<sup>2</sup>School of Materials Science and Engineering, Shanghai Institute of Technology, Shanghai, 201418, PR China, xiaoweixu@sit.edu.cn;

<sup>3</sup>Sichuan Huachuan Industries Co., Ltd., Chengdu, 610106, PR China, niekunliangep@163.com;

<sup>4</sup>Hangzhou Yanqu Information Technology Co. Ltd., Hangzhou, 310003, PR China

Model and methods of DFT calculation:

We have employed the first-principles<sup>1, 2</sup> to perform all density functional theory (DFT) calculations within the generalized gradient approximation (GGA) using the Perdew-Burke-Ernzerhof (PBE)<sup>3</sup> formulation. We have chosen the projected augmented wave (PAW) potentials<sup>4, 5</sup> to describe the ionic cores and take valence electrons into account using a plane wave basis set with a kinetic energy cutoff of 450 eV. Partial occupancies of the Kohn–Sham orbitals were allowed using the Gaussian smearing method and a width of 0.05 eV. For the optimization of both geometry and lattice size, the Brillouin zone integration was performed with a  $0.04 \text{ \AA}^{-1}$   $k$ -mesh Monkhorst-Pack sampling<sup>6</sup>. The self-consistent calculations applied a convergence energy threshold of  $10^{-5}$  eV. The equilibrium geometries and lattice constants were optimized with maximum stress on each atom within  $0.02 \text{ eV \AA}^{-1}$ . The 15 Å vacuum layer was normally added to the surface to eliminate the artificial interactions between periodic images. The weak interaction was described by DFT+D3 method using empirical correction in Grimme’s scheme<sup>7, 8</sup>. Spin polarization method was adopted to describe the magnetic system. The adsorption energy of adsorbent was calculated as:  $E_{\text{ads}} = E(*\text{adsorbent}) - E(*) - E(\text{adsorbent})$ .  $E(*\text{adsorbent})$ ,  $E(*)$  and  $E(\text{adsorbent})$  represent the total energy of \* adsorbent, \* and adsorbent molecule, respectively. What’s more, the input files and output data of band structure and DOS were generated by the tool——Vasppkit<sup>9</sup>.

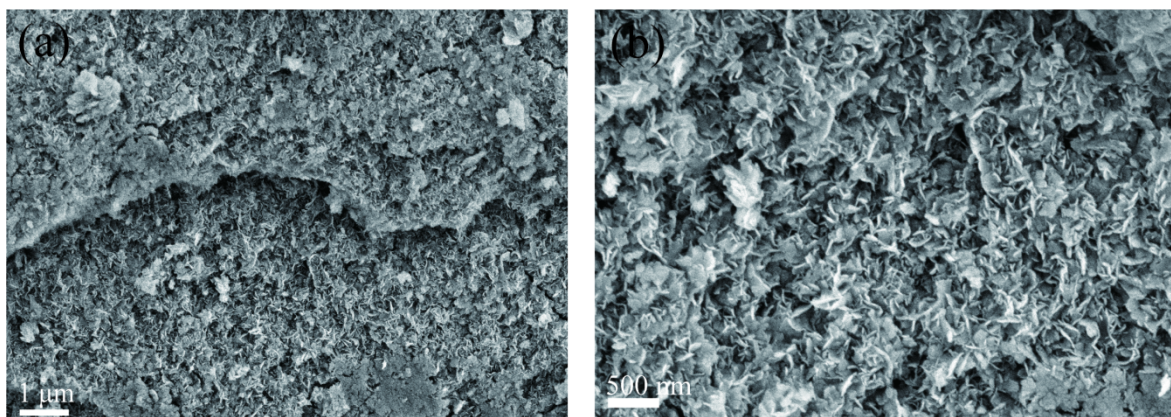

**Figure S1.** SEM images of NiAl-LDH.

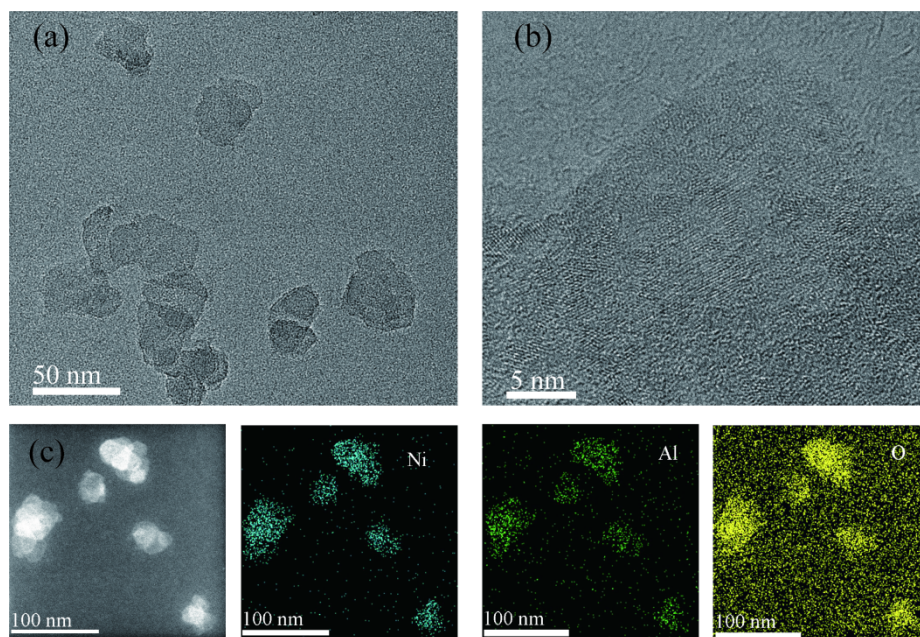

**Figure S2.** TEM images and EDS mappings of NiAl-LDH.

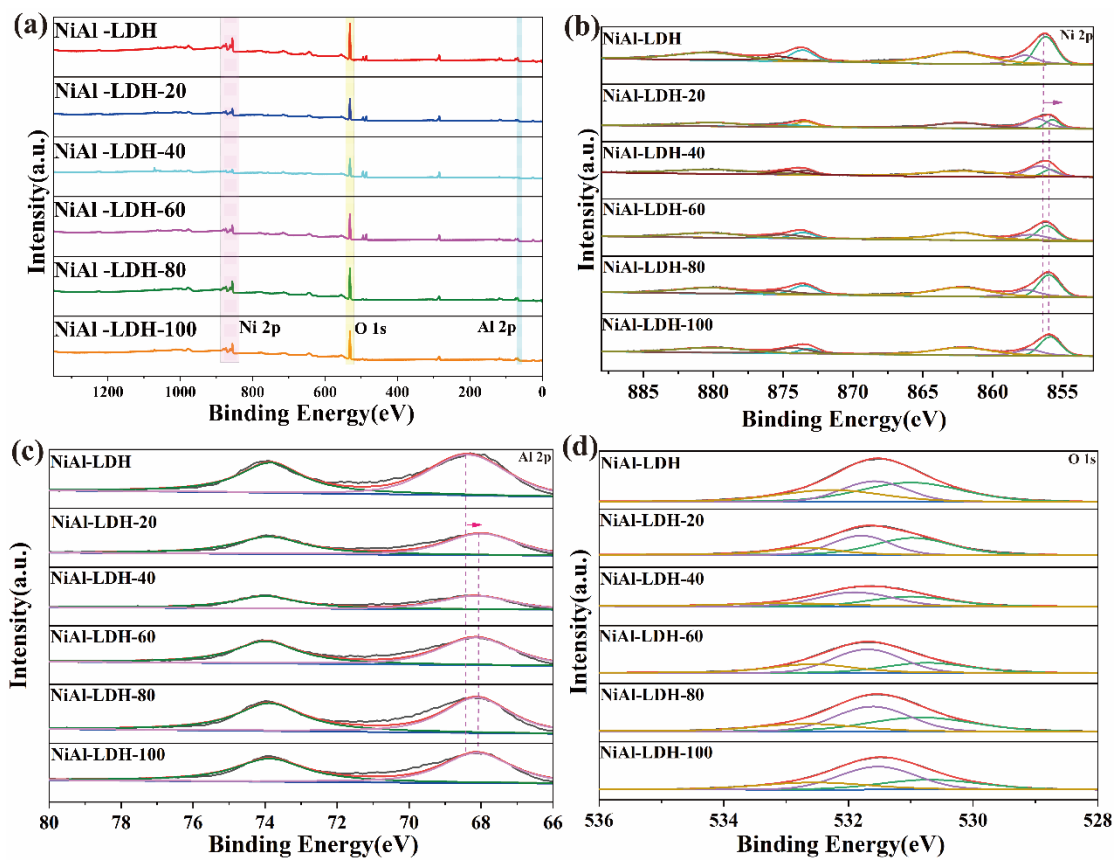

**Figure S3.** XPS spectra of NiAl-LDH and NiAl-LDH with different vacancy contents: (a) survey spectra, (b) Ni 2p, (c) Al 2p, and (d) O 1s.

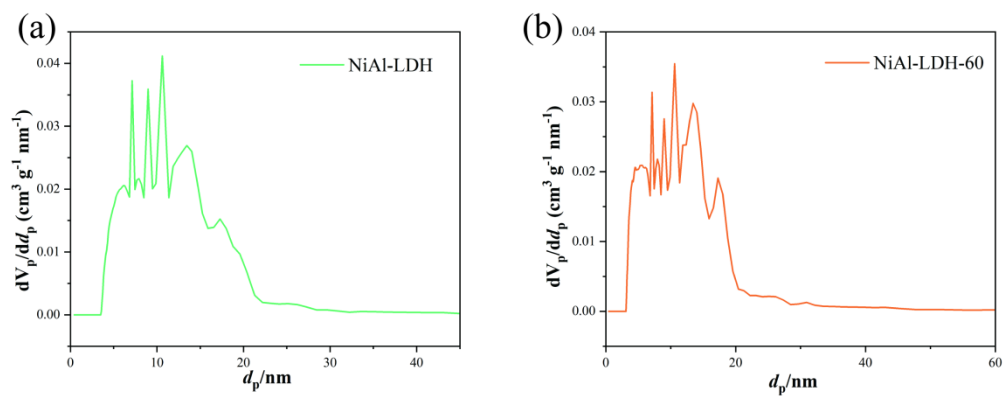

**Figure S4.** Pore size distribution of (a) NiAl-LDH-60 and (b) NiAl-LDH.

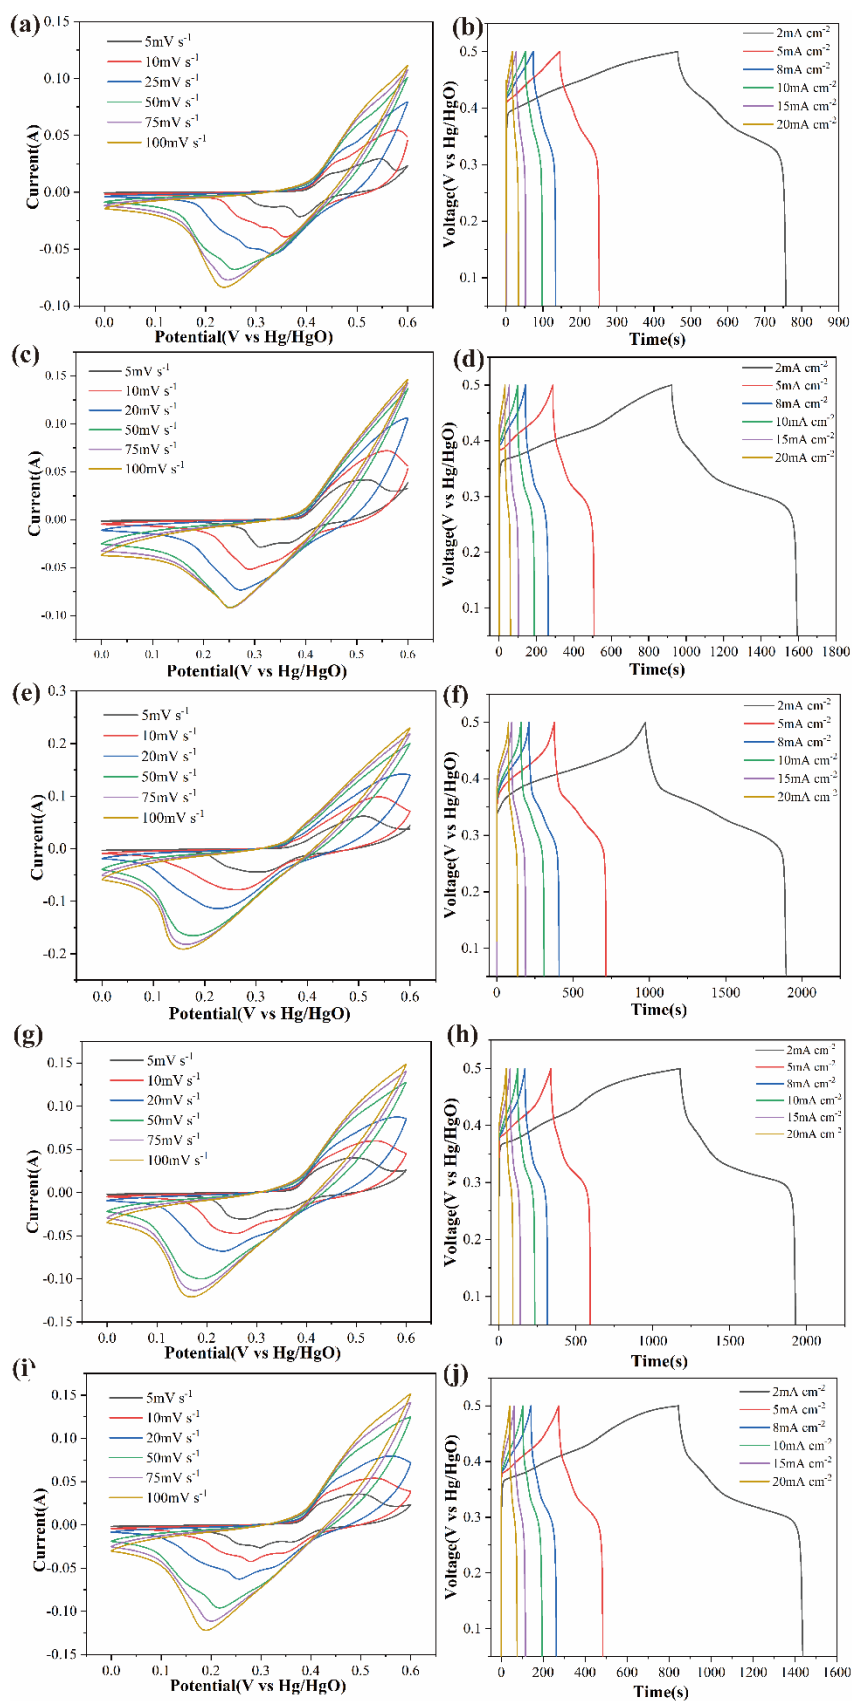

**Figure S5.** (a) CV and (b) GCD curves of NiAl-LDH; (c) CV and (d) GCD curves of NiAl-LDH-20; (e) CV and (f) GCD curves of NiAl-LDH-40; (g) CV and (h) GCD curves of NiAl-LDH-80; (i) CV and (j) GCD curves of NiAl-LDH-100.

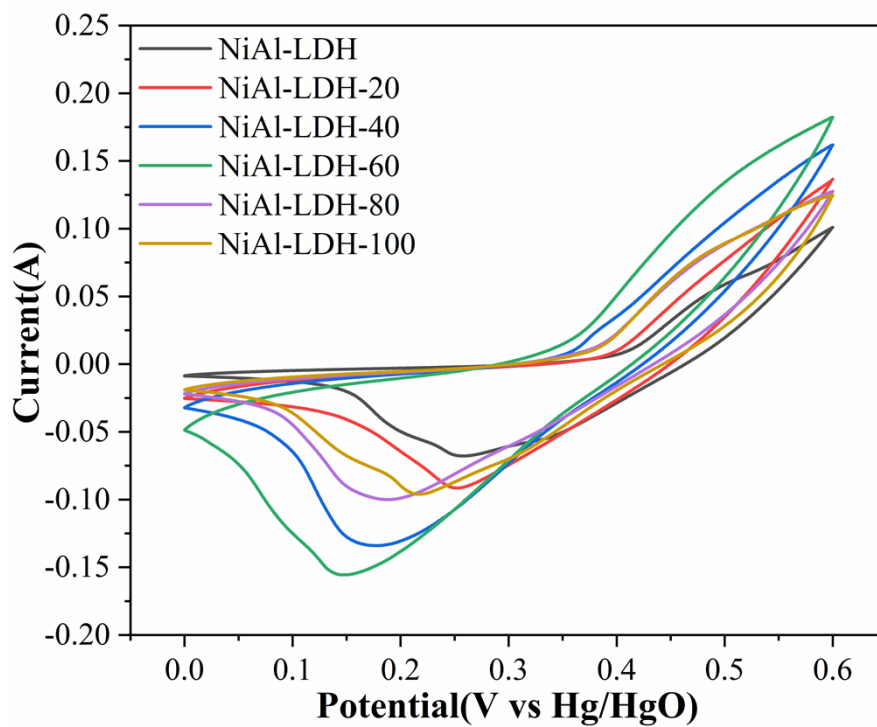

**Figure S6.** CV comparison plots of NiAl-LDH with different oxygen vacancy concentrations at 50 mV s<sup>-1</sup> sweep rates.



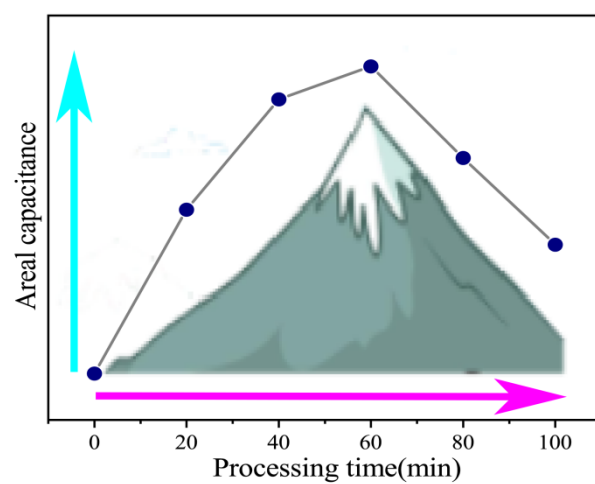

**Figure S7.** Volcano-type trend of the areal capacitances.

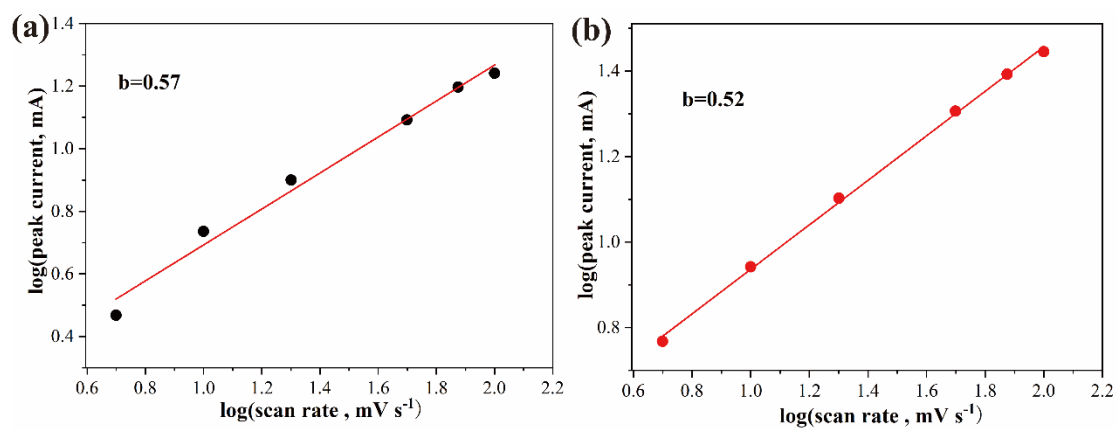

**Figure S8.** Plot of the anodic peak current density against the scan rate for electrode (a) NiAl-LDH; (b) NiAl-LDH-60.

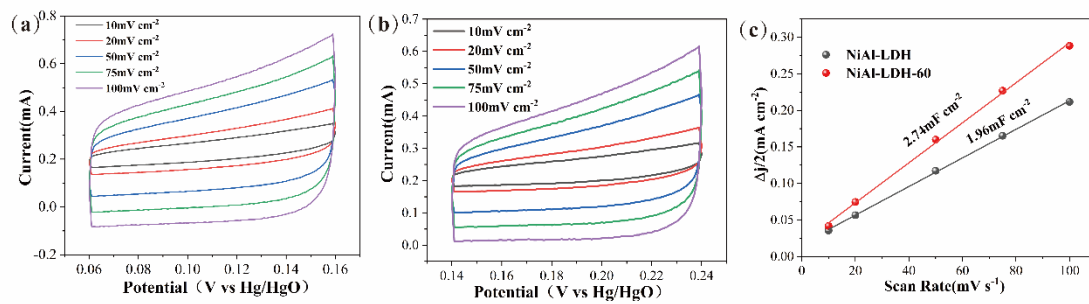

**Figure S9.** CV curves in the non-faradaic capacitance current range. (a)NiAl-LDH; (b)NiAl-LDH-60; (c) Cdl curves of NiAl-LDH and NiAl-LDH-60.

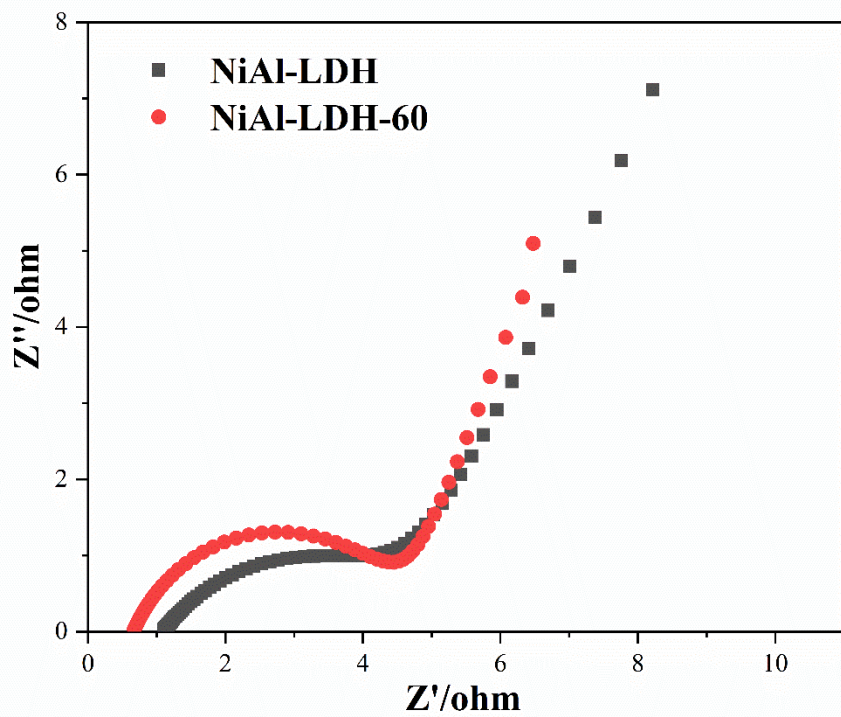

Figure S10. EIS plots for NiAl-LDH and NiAl-LDH-60.

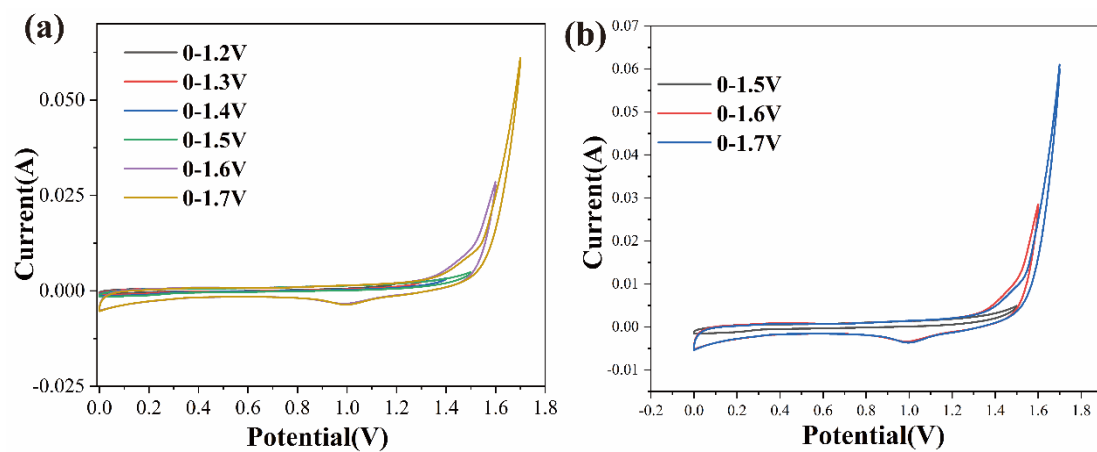

**Figure S11.** (a) CV curves at a scan rate of 100 mVs<sup>-1</sup> under different voltage windows (0-1.2 V to 0-1.7 V); (b) voltage windows of 1.5V, 1.6V and 1.7V.

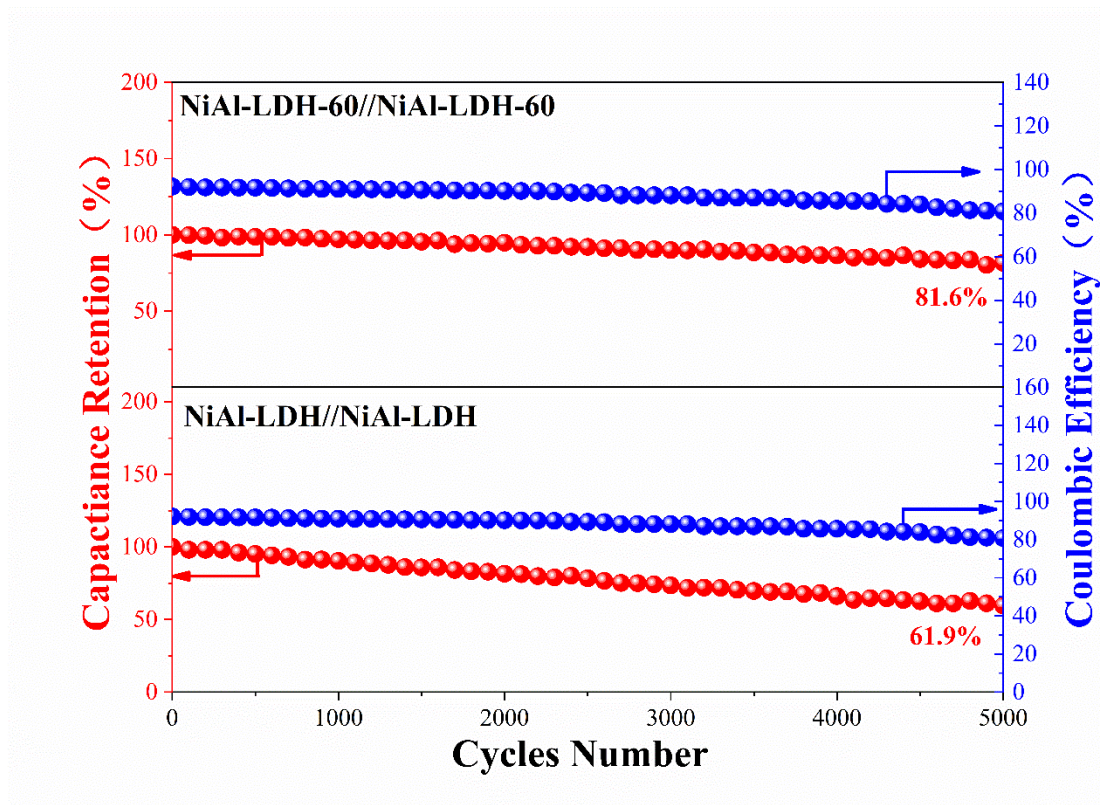

Figure S12. Cycling performance of the SSC device.

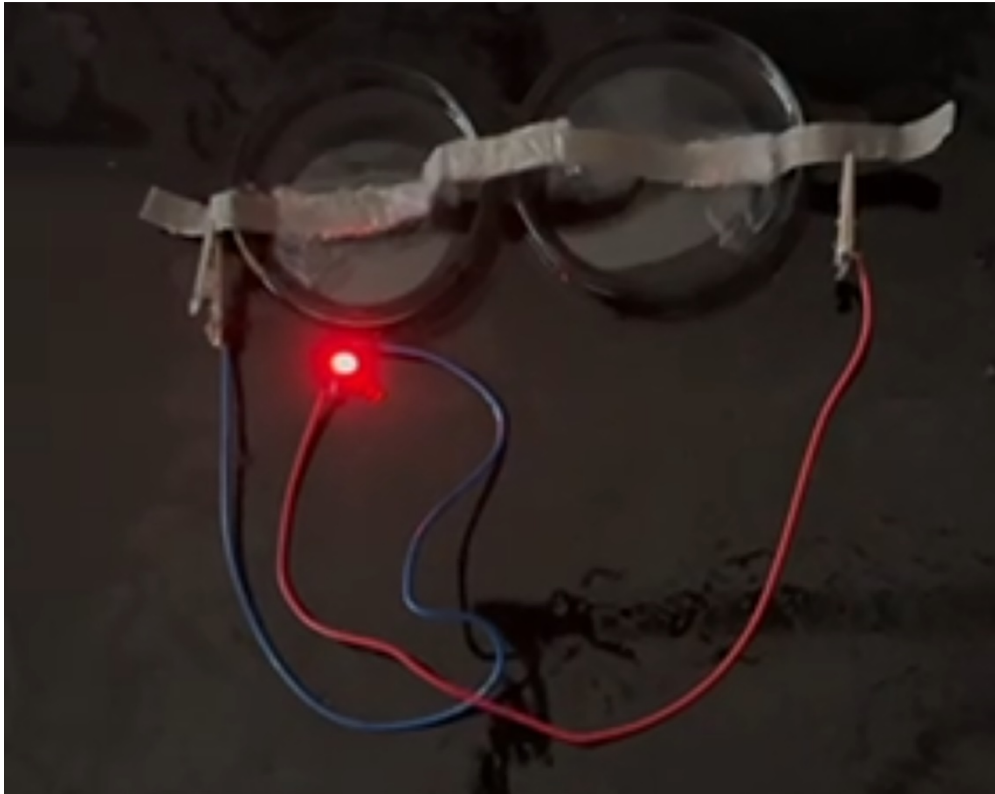

**Figure S13.** Real application of two as-prepared SSC devices in series to light up a red LED indicator.

**Table S1.** Adsorption energy of NiAl-LDH-60

| Units (eV) | The first OH- | The second OH- |
|------------|---------------|----------------|
| E(OH)      | -7.7290       | -7.7290        |
| E(slab)    | -659.4136     | -671.1244      |
| E(slab*OH) | -671.1244     | -683.1926      |
| E(ads)     | -3.9817       | -4.3392        |

**References:**

- [1] Kresse, G.; Furthmüller, J., Efficient iterative schemes for ab initio total-energy calculations using a plane-wave basis set. *Phys Rev B Condens Matter* **1996**, *54* (16), 11169-11186.
- [2] Kresse, G.; Furthmüller, J., Efficiency of ab-initio total energy calculations for metals and semiconductors using a plane-wave basis set. *Computational Materials Science* **1996**, *6* (1), 15-50.
- [3] Perdew, J. P.; Burke, K.; Ernzerhof, M., Generalized Gradient Approximation Made Simple. *Phys Rev Lett* **1996**, *77* (18), 3865-3868.
- [4] Kresse, G.; Joubert, D., From ultrasoft pseudopotentials to the projector augmented-wave method. *Physical Review B* **1999**, *59* (3), 1758-1775.
- [5] Blochl, P. E., Projector augmented-wave method. *Phys Rev B Condens Matter* **1994**, *50* (24), 17953-17979.
- [6] Monkhorst, H. J.; Pack, J. D., Special points for Brillouin-zone integrations. *Physical Review B* **1976**, *13* (12), 5188-5192.
- [7] Grimme, S.; Antony, J.; Ehrlich, S.; Krieg, H., A consistent and accurate ab initio parametrization of density functional dispersion correction (DFT-D) for the 94 elements H-Pu. *J Chem Phys* **2010**, *132* (15), 154104.
- [8] Grimme, S.; Ehrlich, S.; Goerigk, L., Effect of the damping function in dispersion corrected density functional theory. *J Comput Chem* **2011**, *32* (7), 1456-65.
- [9] Wang, V.; Xu, N.; Liu, J.-C.; Tang, G.; Geng, W.-T., VASPKIT: A user-friendly interface facilitating high-throughput computing and analysis using VASP code. *Computer Physics Communications* **2021**, 267.
